# Supplementary material for: High UV Sensitivity in Graphene-Silicon Schottky Photodiodes in Industry Standard Packaging
Source: Research Square preprint supplement (doi:10.21203/rs.3.rs-7851174/v1), 2025-11-25
Supplement: Supplementary file 1 [file 51f60e88fc01ca1dfd0d19a8.docx]

**Supplementary Information**

**High UV Sensitivity in Graphene-Silicon Schottky Photodiodes in Industry Standard Packaging**

Ardeshir Esteki1,°, Christoph P. Gebauer1,2,°, Jülide Avci2, Heinrich D. B. Gottlob2, Max C. Lemme1,3,*

1Chair of Electronic Devices, RWTH Aachen University, Otto-Blumenthal-Strasse 2, 52074 Aachen, Germany

2Vishay Semiconductor GmbH, Theresienstrasse 2, 74072 Heilbronn, Germany

3AMO GmbH, Otto-Blumenthal-Str. 25, 52074 Aachen, Germany

*°These authors contributed equally.*

**Corresponding Author:* [*max.lemme@eld.rwth-aachen.de*](mailto:max.lemme@eld.rwth-aachen.de)


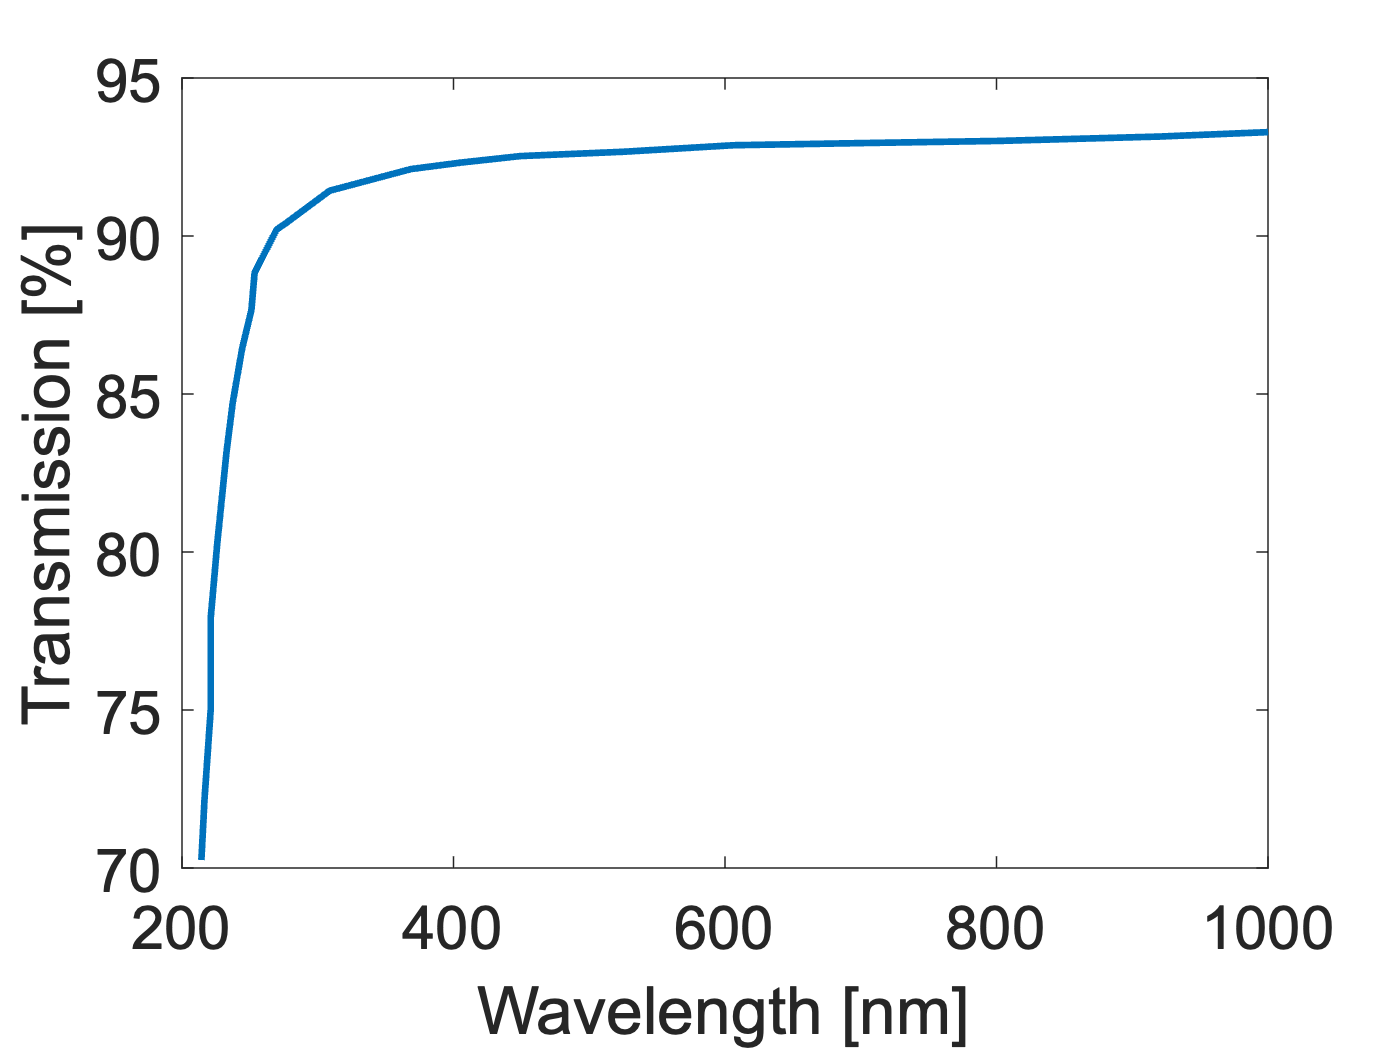


**SI Figure 1.** Optical transmission spectrum of the UV-transparent glass used to hermetically seal the TO18 header. The measurement shows high transmittance above 90% across most of the visible and near-infrared range, with good transparency starting from ~250 nm.
